# Supplementary material
Source: PubMed Central journal article supplement (PMC4013163)
Supplement: cc-13-1132-s01.pdf [file cc-13-1132-s01.pdf]

## **Supplemental Material to:**

**Cristina Oliveras-Ferraros, Alejandro Vazquez-Martin, Elisabet Cuyàs, Bruna Corominas-Faja, Esther Rodríguez-Gallego, Salvador Fernández-Arroyo, Begoña Martín-Castillo, Jorge Joven, and Javier A Menendez**

**Acquired resistance to metformin in breast cancer cells triggers transcriptome reprogramming toward a degradome-related metastatic stem-like profile**

**Cell Cycle 2014; 13(7)**

**<http://dx.doi.org/10.4161/cc.27982>**

**<http://www.landesbioscience.com/journals/cc/article/27982>**

**Supplementary Table 1. Gene transcripts differentially up-regulated in metformin-refractory MCF-7/MET-R cells vs. metformin-naive MCF-7 parental cells.**

| <b>Symbol</b>      | <b>Entrez Gene Name</b>                                          | <b><math>\Delta</math></b> |
|--------------------|------------------------------------------------------------------|----------------------------|
| <b>KLK11</b>       | kallikrein-related peptidase 11                                  | 30,460                     |
| <b>CTSF</b>        | cathepsin F                                                      | 24,119                     |
| <b>TNFSF10</b>     | tumor necrosis factor (ligand) superfamily, member 10            | 17,960                     |
| <b>TNFAIP2</b>     | tumor necrosis factor, alpha-induced protein 2                   | 13,558                     |
| <b>TMTC1</b>       | transmembrane and tetratricopeptide repeat containing 1          | 13,390                     |
| <b>DCLK1</b>       | doublecortin-like kinase 1                                       | 12,452                     |
| <b>MGLL</b>        | monoglyceride lipase                                             | 12,360                     |
| <b>WISP2</b>       | WNT1 inducible signaling pathway protein 2                       | 10,812                     |
| <b>FRAS1</b>       | Fraser syndrome 1                                                | 10,342                     |
| <b>CYP1B1</b>      | cytochrome P450, family 1, subfamily B, polypeptide 1            | 10,268                     |
| <b>SUSD3</b>       | sushi domain containing 3                                        | 10,089                     |
| <b>SPATS2L</b>     | spermatogenesis associated, serine-rich 2-like                   | 9,871                      |
| <b>UGT1A6</b>      | UDP glucuronosyltransferase 1 family, polypeptide A6             | 9,710                      |
| <b>COL3A1</b>      | collagen, type III, alpha 1                                      | 9,040                      |
| <b>SLC16A2</b>     | solute carrier family 16, member 2 (thyroid hormone transporter) | 8,509                      |
| <b>TMPRSS2</b>     | transmembrane protease, serine 2                                 | 8,120                      |
| <b>SLIT2</b>       | slit homolog 2 (Drosophila)                                      | 8,104                      |
| <b>RAMP3</b>       | receptor (G protein-coupled) activity modifying protein 3        | 7,873                      |
| <b>CD44</b>        | CD44 molecule (Indian blood group)                               | 7,760                      |
| <b>AKR1C3</b>      | aldo-keto reductase family 1, member C3                          | 7,533                      |
| <b>NDRG1</b>       | N-myc downstream regulated 1                                     | 7,301                      |
| <b>LXN</b>         | latexin                                                          | 6,865                      |
| <b>LOC440335</b>   | uncharacterized LOC440335                                        | 6,704                      |
| <b>CCDC147-AS1</b> | CCDC147 antisense RNA 1 (head to head)                           | 6,386                      |
| <b>DACH1</b>       | dachshund homolog 1 (Drosophila)                                 | 6,216                      |
| <b>SCIN</b>        | scinderin                                                        | 6,121                      |
| <b>GPR68</b>       | G protein-coupled receptor 68                                    | 6,098                      |
| <b>NMB</b>         | neuromedin B                                                     | 6,095                      |
| <b>ACE2</b>        | angiotensin I converting enzyme (peptidyl-dipeptidase A) 2       | 6,093                      |
| <b>RBP7</b>        | retinol binding protein 7, cellular                              | 6,062                      |

|                     |                                                               |       |
|---------------------|---------------------------------------------------------------|-------|
| <b>CAMK2D</b>       | calcium/calmodulin-dependent protein kinase II delta          | 5,990 |
| <b>CTSH</b>         | cathepsin H                                                   | 5,946 |
| <b>FRMD3</b>        | FERM domain containing 3                                      | 5,694 |
| <b>SESN3</b>        | sestrin 3                                                     | 5,546 |
| <b>DHRS3</b>        | dehydrogenase/reductase (SDR family) member 3                 | 5,522 |
| <b>KCNJ8</b>        | potassium inwardly-rectifying channel, subfamily J, member 8  | 5,468 |
| <b>NAPRT1</b>       | nicotinate phosphoribosyltransferase domain containing 1      | 5,320 |
| <b>CXCL12</b>       | chemokine (C-X-C motif) ligand 12                             | 5,260 |
| <b>PAK6</b>         | p21 protein (Cdc42/Rac)-activated kinase 6                    | 5,192 |
| <b>B3GNT5</b>       | UDP-GlcNAc:betaGal beta-1,3-N-acetylglucosaminyltransferase 5 | 5,190 |
| <b>C15orf59</b>     | chromosome 15 open reading frame 59                           | 5,136 |
| <b>PPM1K</b>        | protein phosphatase, Mg2+/Mn2+ dependent, 1K                  | 5,121 |
| <b>LAMA3</b>        | laminin, alpha 3                                              | 5,100 |
| <b>ACSS1</b>        | acyl-CoA synthetase short-chain family member 1               | 5,013 |
| <b>LINC00478</b>    | long intergenic non-protein coding RNA 478                    | 4,980 |
| <b>MCOLN2</b>       | mucolipin 2                                                   | 4,864 |
| <b>HOXB-AS1</b>     | HOXB cluster antisense RNA 1                                  | 4,847 |
| <b>MUC1</b>         | mucin 1, cell surface associated                              | 4,807 |
| <b>CA12</b>         | carbonic anhydrase XII                                        | 4,700 |
| <b>KCNJ3</b>        | potassium inwardly-rectifying channel, subfamily J, member 3  | 4,697 |
| <b>TCEAL8</b>       | transcription elongation factor A (SII)-like 8                | 4,682 |
| <b>PSG6</b>         | pregnancy specific beta-1-glycoprotein 6                      | 4,676 |
| <b>HPDL</b>         | 4-hydroxyphenylpyruvate dioxygenase-like                      | 4,625 |
| <b>LOC100505806</b> | uncharacterized LOC100505806                                  | 4,608 |
| <b>NELL2</b>        | NEL-like 2 (chicken)                                          | 4,417 |
| <b>RGS16</b>        | regulator of G-protein signaling 16                           | 4,370 |
| <b>DOCK10</b>       | dedicator of cytokinesis 10                                   | 4,365 |
| <b>AMIGO2</b>       | adhesion molecule with Ig-like domain 2                       | 4,364 |
| <b>TBC1D9</b>       | TBC1 domain family, member 9 (with GRAM domain)               | 4,334 |
| <b>IGH</b>          | immunoglobulin heavy locus                                    | 4,299 |
| <b>EPAS1</b>        | endothelial PAS domain protein 1                              | 4,280 |
| <b>CXCR7</b>        | chemokine (C-X-C motif) receptor 7                            | 4,221 |
| <b>MMP16</b>        | matrix metalloproteinase 16 (membrane-inserted)               | 4,218 |
| <b>ST3GAL1</b>      | ST3 beta-galactoside alpha-2,3-sialyltransferase 1            | 4,210 |
| <b>DDAH1</b>        | dimethylarginine dimethylaminohydrolase 1                     | 4,185 |

|                     |                                                                                   |       |
|---------------------|-----------------------------------------------------------------------------------|-------|
| <b>CITED4</b>       | Cbp/p300-interacting transactivator, with Glu/Asp-rich carboxy-terminal domain, 4 | 4,042 |
| <b>CALCR</b>        | calcitonin receptor                                                               | 4,042 |
| <b>S100A8</b>       | S100 calcium binding protein A8                                                   | 4,007 |
| <b>CPAMD8</b>       | C3 and PZP-like, alpha-2-macroglobulin domain containing 8                        | 3,978 |
| <b>SIGLEC15</b>     | sialic acid binding Ig-like lectin 15                                             | 3,935 |
| <b>SLC24A3</b>      | solute carrier family 24 (sodium/potassium/calcium exchanger), member 3           | 3,838 |
| <b>CA2</b>          | carbonic anhydrase II                                                             | 3,806 |
| <b>FBXO2</b>        | F-box protein 2                                                                   | 3,759 |
| <b>HMGCLL1</b>      | 3-hydroxymethyl-3-methylglutaryl-CoA lyase-like 1                                 | 3,758 |
| <b>RNF145</b>       | ring finger protein 145                                                           | 3,715 |
| <b>LOC100506630</b> | uncharacterized LOC100506630                                                      | 3,645 |
| <b>TSKU</b>         | tsukushi, small leucine rich proteoglycan                                         | 3,643 |
| <b>TLE4</b>         | transducin-like enhancer of split 4 (E(sp1) homolog, Drosophila)                  | 3,633 |
| <b>SLC6A14</b>      | solute carrier family 6 (amino acid transporter), member 14                       | 3,620 |
| <b>VLDLR</b>        | very low density lipoprotein receptor                                             | 3,578 |
| <b>CPLX3</b>        | complexin 3                                                                       | 3,575 |
| <b>IFFO2</b>        | intermediate filament family orphan 2                                             | 3,558 |
| <b>KANK1</b>        | KN motif and ankyrin repeat domains 1                                             | 3,540 |
| <b>SCARNA17</b>     | small Cajal body-specific RNA 17                                                  | 3,521 |
| <b>TGFBI</b>        | transforming growth factor, beta-induced, 68kDa                                   | 3,495 |
| <b>FAM5C</b>        | family with sequence similarity 5, member C                                       | 3,494 |
| <b>NFIL3</b>        | nuclear factor, interleukin 3 regulated                                           | 3,486 |
| <b>LDHB</b>         | lactate dehydrogenase B                                                           | 3,473 |
| <b>ARHGEF10L</b>    | Rho guanine nucleotide exchange factor (GEF) 10-like                              | 3,420 |
| <b>SLC1A2</b>       | solute carrier family 1 (glial high affinity glutamate transporter), member 2     | 3,417 |
| <b>MAFB</b>         | v-maf musculoaponeurotic fibrosarcoma oncogene homolog B (avian)                  | 3,393 |
| <b>MBNL2</b>        | muscleblind-like splicing regulator 2                                             | 3,391 |
| <b>LYN</b>          | v-yes-1 Yamaguchi sarcoma viral related oncogene homolog                          | 3,380 |
| <b>TMPRSS4</b>      | transmembrane protease, serine 4                                                  | 3,368 |
| <b>LAMB3</b>        | laminin, beta 3                                                                   | 3,365 |
| <b>TMEM37</b>       | transmembrane protein 37                                                          | 3,355 |
| <b>RILP</b>         | Rab interacting lysosomal protein                                                 | 3,323 |
| <b>MALAT1</b>       | metastasis associated lung adenocarcinoma transcript 1 (non-protein coding)       | 3,320 |
| <b>MYOF</b>         | myoferlin                                                                         | 3,300 |
| <b>IFI6</b>         | interferon, alpha-inducible protein 6                                             | 3,293 |

|                 |                                                                                |       |
|-----------------|--------------------------------------------------------------------------------|-------|
| <b>SLITRK4</b>  | SLIT and NTRK-like family, member 4                                            | 3,291 |
| <b>TFPI</b>     | tissue factor pathway inhibitor (lipoprotein-associated coagulation inhibitor) | 3,267 |
| <b>LUC7L3</b>   | LUC7-like 3 ( <i>S. cerevisiae</i> )                                           | 3,260 |
| <b>PLXND1</b>   | plexin D1                                                                      | 3,260 |
| <b>CDH26</b>    | cadherin 26                                                                    | 3,233 |
| <b>CEBPD</b>    | CCAAT/enhancer binding protein (C/EBP), delta                                  | 3,195 |
| <b>HK2</b>      | hexokinase 2                                                                   | 3,190 |
| <b>OXCT1</b>    | 3-oxoacid CoA transferase 1                                                    | 3,183 |
| <b>SPNS2</b>    | spinster homolog 2 ( <i>Drosophila</i> )                                       | 3,181 |
| <b>SEPP1</b>    | selenoprotein P, plasma, 1                                                     | 3,178 |
| <b>SIPA1</b>    | signal-induced proliferation-associated 1                                      | 3,163 |
| <b>TUBA4A</b>   | tubulin, alpha 4a                                                              | 3,155 |
| <b>HCAR1</b>    | hydroxycarboxylic acid receptor 1                                              | 3,155 |
| <b>SPAG4</b>    | sperm associated antigen 4                                                     | 3,151 |
| <b>S100A6</b>   | S100 calcium binding protein A6                                                | 3,129 |
| <b>FOSL2</b>    | FOS-like antigen 2                                                             | 3,126 |
| <b>DDIT3</b>    | DNA-damage-inducible transcript 3                                              | 3,120 |
| <b>BTG2</b>     | BTG family, member 2                                                           | 3,112 |
| <b>NBEA</b>     | neurobeachin                                                                   | 3,093 |
| <b>DNAJA4</b>   | DnaJ (Hsp40) homolog, subfamily A, member 4                                    | 3,080 |
| <b>C5orf42</b>  | chromosome 5 open reading frame 42                                             | 3,070 |
| <b>HOXB3</b>    | homeobox B3                                                                    | 3,069 |
| <b>HYI</b>      | hydroxypyruvate isomerase (putative)                                           | 3,050 |
| <b>CMTM3</b>    | CKLF-like MARVEL transmembrane domain containing 3                             | 3,045 |
| <b>RANGRF</b>   | RAN guanine nucleotide release factor                                          | 3,035 |
| <b>PSG8</b>     | pregnancy specific beta-1-glycoprotein 8                                       | 3,021 |
| <b>PLA2G16</b>  | phospholipase A2, group XVI                                                    | 3,019 |
| <b>ADCY1</b>    | adenylate cyclase 1 (brain)                                                    | 3,009 |
| <b>SLCO3A1</b>  | solute carrier organic anion transporter family, member 3A1                    | 2,998 |
| <b>USP31</b>    | ubiquitin specific peptidase 31                                                | 2,997 |
| <b>SYBU</b>     | syntabulin (syntaxin-interacting)                                              | 2,975 |
| <b>MDK</b>      | midkine (neurite growth-promoting factor 2)                                    | 2,955 |
| <b>KIAA1875</b> | KIAA1875                                                                       | 2,940 |
| <b>PURB</b>     | purine-rich element binding protein B                                          | 2,938 |
| <b>HRK</b>      | harakiri, BCL2 interacting protein (contains only BH3 domain)                  | 2,937 |

|                     |                                                                             |       |
|---------------------|-----------------------------------------------------------------------------|-------|
| <b>NKAIN1</b>       | Na+/K+ transporting ATPase interacting 1                                    | 2,934 |
| <b>TGFBR2</b>       | transforming growth factor, beta receptor II (70/80kDa)                     | 2,933 |
| <b>GOLGA8S</b>      | golgin A8 family, member S                                                  | 2,932 |
| <b>NCKAP5</b>       | NCK-associated protein 5                                                    | 2,920 |
| <b>CTSC</b>         | cathepsin C                                                                 | 2,888 |
| <b>IFT122</b>       | intraflagellar transport 122 homolog (Chlamydomonas)                        | 2,885 |
| <b>LOC283454</b>    | uncharacterized LOC283454                                                   | 2,877 |
| <b>PON2</b>         | paraoxonase 2                                                               | 2,851 |
| <b>PDK1</b>         | pyruvate dehydrogenase kinase, isozyme 1                                    | 2,820 |
| <b>BTG3</b>         | BTG family, member 3                                                        | 2,818 |
| <b>KLK8</b>         | kallikrein-related peptidase 8                                              | 2,807 |
| <b>L3MBTL3</b>      | l(3)mbt-like 3 (Drosophila)                                                 | 2,803 |
| <b>USP25</b>        | ubiquitin specific peptidase 25                                             | 2,801 |
| <b>C11orf92</b>     | chromosome 11 open reading frame 92                                         | 2,796 |
| <b>HERC6</b>        | HECT and RLD domain containing E3 ubiquitin protein ligase family member 6  | 2,794 |
| <b>ARL4C</b>        | ADP-ribosylation factor-like 4C                                             | 2,786 |
| <b>EPHX2</b>        | epoxide hydrolase 2, cytoplasmic                                            | 2,786 |
| <b>IDH1</b>         | isocitrate dehydrogenase 1 (NADP+), soluble                                 | 2,786 |
| <b>EFNB2</b>        | ephrin-B2                                                                   | 2,779 |
| <b>UBE2QL1</b>      | ubiquitin-conjugating enzyme E2Q family-like 1                              | 2,772 |
| <b>FAM63A</b>       | family with sequence similarity 63, member A                                | 2,771 |
| <b>WWOX</b>         | WW domain containing oxidoreductase                                         | 2,768 |
| <b>SYT1</b>         | synaptotagmin I                                                             | 2,768 |
| <b>ELF3</b>         | E74-like factor 3 (ets domain transcription factor, epithelial-specific )   | 2,750 |
| <b>GBE1</b>         | glucan (1,4-alpha-), branching enzyme 1                                     | 2,749 |
| <b>MPI</b>          | mannose phosphate isomerase                                                 | 2,745 |
| <b>LOC100507303</b> | uncharacterized LOC100507303                                                | 2,744 |
| <b>ATF3</b>         | activating transcription factor 3                                           | 2,744 |
| <b>PCED1B</b>       | PC-esterase domain containing 1B                                            | 2,736 |
| <b>NUPR1</b>        | nuclear protein, transcriptional regulator, 1                               | 2,731 |
| <b>EPDR1</b>        | ependymin related protein 1 (zebrafish)                                     | 2,727 |
| <b>PLEKHF1</b>      | pleckstrin homology domain containing, family F (with FYVE domain) member 1 | 2,720 |
| <b>ANKRD22</b>      | ankyrin repeat domain 22                                                    | 2,716 |
| <b>STEAP3</b>       | STEAP family member 3, metalloreductase                                     | 2,710 |
| <b>PSG9</b>         | pregnancy specific beta-1-glycoprotein 9                                    | 2,710 |

|                  |                                                                    |       |
|------------------|--------------------------------------------------------------------|-------|
| <b>VCX2</b>      | variable charge, X-linked 2                                        | 2,708 |
| <b>CAB39L</b>    | calcium binding protein 39-like                                    | 2,698 |
| <b>ARHGAP44</b>  | Rho GTPase activating protein 44                                   | 2,695 |
| <b>EPHA4</b>     | EPH receptor A4                                                    | 2,690 |
| <b>CYP27B1</b>   | cytochrome P450, family 27, subfamily B, polypeptide 1             | 2,683 |
| <b>SV2B</b>      | synaptic vesicle glycoprotein 2B                                   | 2,670 |
| <b>NUFIP2</b>    | nuclear fragile X mental retardation protein interacting protein 2 | 2,665 |
| <b>CGNL1</b>     | cingulin-like 1                                                    | 2,660 |
| <b>KAT2B</b>     | K(lysine) acetyltransferase 2B                                     | 2,656 |
| <b>FAM198B</b>   | family with sequence similarity 198, member B                      | 2,651 |
| <b>DOCK8</b>     | dedicator of cytokinesis 8                                         | 2,648 |
| <b>WSB1</b>      | WD repeat and SOCS box containing 1                                | 2,646 |
| <b>PTRF</b>      | polymerase I and transcript release factor                         | 2,644 |
| <b>VCX3A</b>     | variable charge, X-linked 3A                                       | 2,631 |
| <b>SDR42E1</b>   | short chain dehydrogenase/reductase family 42E, member 1           | 2,627 |
| <b>NABP1</b>     | nucleic acid binding protein 1                                     | 2,626 |
| <b>EPHA3</b>     | EPH receptor A3                                                    | 2,620 |
| <b>SMTNL2</b>    | smoothelin-like 2                                                  | 2,620 |
| <b>DMRTA1</b>    | DMRT-like family A1                                                | 2,619 |
| <b>HOXB2</b>     | homeobox B2                                                        | 2,617 |
| <b>SCPEP1</b>    | serine carboxypeptidase 1                                          | 2,608 |
| <b>BMP5</b>      | bone morphogenetic protein 5                                       | 2,601 |
| <b>LIN7A</b>     | lin-7 homolog A (C. elegans)                                       | 2,591 |
| <b>SLC8A1</b>    | solute carrier family 8 (sodium/calcium exchanger), member 1       | 2,589 |
| <b>SKAP1</b>     | src kinase associated phosphoprotein 1                             | 2,584 |
| <b>TESC</b>      | tescalcin                                                          | 2,582 |
| <b>FUT8-AS1</b>  | FUT8 antisense RNA 1                                               | 2,580 |
| <b>SELENBP1</b>  | selenium binding protein 1                                         | 2,577 |
| <b>DRAM1</b>     | DNA-damage regulated autophagy modulator 1                         | 2,570 |
| <b>PTGR1</b>     | prostaglandin reductase 1                                          | 2,568 |
| <b>GAD1</b>      | glutamate decarboxylase 1 (brain, 67kDa)                           | 2,567 |
| <b>SNX7</b>      | sorting nexin 7                                                    | 2,567 |
| <b>ENPP1</b>     | ectonucleotide pyrophosphatase/phosphodiesterase 1                 | 2,562 |
| <b>HS6ST3</b>    | heparan sulfate 6-O-sulfotransferase 3                             | 2,555 |
| <b>LOC388242</b> | coiled-coil domain containing 101 pseudogene                       | 2,555 |

|                      |                                                                                                                                             |       |
|----------------------|---------------------------------------------------------------------------------------------------------------------------------------------|-------|
| <b>PTPRF</b>         | protein tyrosine phosphatase, receptor type, F                                                                                              | 2,552 |
| <b>PAM</b>           | peptidylglycine alpha-amidating monooxygenase                                                                                               | 2,550 |
| <b>CAMK2N1</b>       | calcium/calmodulin-dependent protein kinase II inhibitor 1                                                                                  | 2,539 |
| <b>PHKB</b>          | phosphorylase kinase, beta                                                                                                                  | 2,532 |
| <b>RAB32</b>         | RAB32, member RAS oncogene family                                                                                                           | 2,531 |
| <b>LOXL1</b>         | lysyl oxidase-like 1                                                                                                                        | 2,529 |
| <b>GNB4</b>          | guanine nucleotide binding protein (G protein), beta polypeptide 4                                                                          | 2,526 |
| <b>IRX4</b>          | iroquois homeobox 4                                                                                                                         | 2,525 |
| <b>NREP</b>          | neuronal regeneration related protein                                                                                                       | 2,518 |
| <b>PPP1R3B</b>       | protein phosphatase 1, regulatory subunit 3B                                                                                                | 2,517 |
| <b>CD97</b>          | CD97 molecule                                                                                                                               | 2,512 |
| <b>RNF43</b>         | ring finger protein 43                                                                                                                      | 2,508 |
| <b>SAT2</b>          | spermidine/spermine N1-acetyltransferase family member 2                                                                                    | 2,506 |
| <b>TNFRSF10C</b>     | tumor necrosis factor receptor superfamily, member 10c, decoy without an intracellular domain                                               | 2,505 |
| <b>RPS27L</b>        | ribosomal protein S27-like                                                                                                                  | 2,504 |
| <b>ACTR3C</b>        | ARP3 actin-related protein 3 homolog C (yeast)                                                                                              | 2,503 |
| <b>PCDH10</b>        | protocadherin 10                                                                                                                            | 2,500 |
| <b>CMBL</b>          | carboxymethylenebutenolidase homolog (Pseudomonas)                                                                                          | 2,492 |
| <b>ULK3</b>          | unc-51-like kinase 3 (C. elegans)                                                                                                           | 2,491 |
| <b>GDF15</b>         | growth differentiation factor 15                                                                                                            | 2,487 |
| <b>CAPN12</b>        | calpain 12                                                                                                                                  | 2,487 |
| <b>FNDC3A</b>        | fibronectin type III domain containing 3A                                                                                                   | 2,485 |
| <b>C15orf52</b>      | chromosome 15 open reading frame 52                                                                                                         | 2,480 |
| <b>VDR</b>           | vitamin D (1,25- dihydroxyvitamin D3) receptor                                                                                              | 2,480 |
| <b>NGLY1</b>         | N-glycanase 1                                                                                                                               | 2,476 |
| <b>USP35</b>         | ubiquitin specific peptidase 35                                                                                                             | 2,465 |
| <b>SYTL2</b>         | synaptotagmin-like 2                                                                                                                        | 2,459 |
| <b>SEMA5A</b>        | sema domain, seven thrombospondin repeats (type 1 and type 1-like), transmembrane domain (TM) and short cytoplasmic domain, (semaphorin) 5A | 2,456 |
| <b>AKR1C1/AKR1C2</b> | aldo-keto reductase family 1, member C2                                                                                                     | 2,450 |
| <b>HMOX1</b>         | heme oxygenase (decycling) 1                                                                                                                | 2,450 |
| <b>ZNRF1</b>         | zinc and ring finger 1, E3 ubiquitin protein ligase                                                                                         | 2,445 |
| <b>BAG2</b>          | BCL2-associated athanogene 2                                                                                                                | 2,442 |
| <b>PRRG1</b>         | proline rich Gla (G-carboxyglutamic acid) 1                                                                                                 | 2,442 |
| <b>ERMP1</b>         | endoplasmic reticulum metallopeptidase 1                                                                                                    | 2,435 |



|                      |                                                                                                                  |       |
|----------------------|------------------------------------------------------------------------------------------------------------------|-------|
| <b>LHFPL2</b>        | lipoma HMGIC fusion partner-like 2                                                                               | 2,432 |
| <b>EPHX4</b>         | epoxide hydrolase 4                                                                                              | 2,430 |
| <b>KLK10</b>         | kallikrein-related peptidase 10                                                                                  | 2,430 |
| <b>JUN</b>           | jun proto-oncogene                                                                                               | 2,430 |
| <b>PCDH7</b>         | protocadherin 7                                                                                                  | 2,430 |
| <b>VPS13B</b>        | vacuolar protein sorting 13 homolog B (yeast)                                                                    | 2,430 |
| <b>NQO1</b>          | NAD(P)H dehydrogenase, quinone 1                                                                                 | 2,421 |
| <b>BDKRB2</b>        | bradykinin receptor B2                                                                                           | 2,419 |
| <b>XKRX</b>          | XK, Kell blood group complex subunit-related, X-linked                                                           | 2,415 |
| <b>PLCG2</b>         | phospholipase C, gamma 2 (phosphatidylinositol-specific)                                                         | 2,407 |
| <b>TAP1</b>          | transporter 1, ATP-binding cassette, sub-family B (MDR/TAP)                                                      | 2,403 |
| <b>PLAU</b>          | plasminogen activator, urokinase                                                                                 | 2,400 |
| <b>NECAB1</b>        | N-terminal EF-hand calcium binding protein 1                                                                     | 2,393 |
| <b>PDE7A</b>         | phosphodiesterase 7A                                                                                             | 2,391 |
| <b>WWP1</b>          | WW domain containing E3 ubiquitin protein ligase 1                                                               | 2,390 |
| <b>PPAP2B</b>        | phosphatidic acid phosphatase type 2B                                                                            | 2,388 |
| <b>BCAR3</b>         | breast cancer anti-estrogen resistance 3                                                                         | 2,387 |
| <b>STC1</b>          | stanniocalcin 1                                                                                                  | 2,381 |
| <b>CLIC4</b>         | chloride intracellular channel 4                                                                                 | 2,380 |
| <b>SEMA4C</b>        | sema domain, immunoglobulin domain (Ig), transmembrane domain (TM) and short cytoplasmic domain, (semaphorin) 4C | 2,369 |
| <b>PYROXD2</b>       | pyridine nucleotide-disulphide oxidoreductase domain 2                                                           | 2,368 |
| <b>CTBS</b>          | chitinase, di-N-acetyl-                                                                                          | 2,360 |
| <b>KLRG2</b>         | killer cell lectin-like receptor subfamily G, member 2                                                           | 2,358 |
| <b>ANKRD46</b>       | ankyrin repeat domain 46                                                                                         | 2,355 |
| <b>ZNF185</b>        | zinc finger protein 185 (LIM domain)                                                                             | 2,355 |
| <b>GADD45A</b>       | growth arrest and DNA-damage-inducible, alpha                                                                    | 2,350 |
| <b>KRTCAP3</b>       | keratinocyte associated protein 3                                                                                | 2,338 |
| <b>ARFGEF1</b>       | ADP-ribosylation factor guanine nucleotide-exchange factor 1 (brefeldin A-inhibited)                             | 2,330 |
| <b>FUT8</b>          | fucosyltransferase 8 (alpha (1,6) fucosyltransferase)                                                            | 2,330 |
| <b>LOC284570</b>     | uncharacterized LOC284570                                                                                        | 2,328 |
| <b>CNKSR3</b>        | CNKSR family member 3                                                                                            | 2,326 |
| <b>JMJD7-PLA2G4B</b> | JMJD7-PLA2G4B readthrough                                                                                        | 2,322 |
| <b>CD302</b>         | CD302 molecule                                                                                                   | 2,320 |
| <b>ARHGEF28</b>      | Rho guanine nucleotide exchange factor (GEF) 28                                                                  | 2,319 |

|                  |                                                                                                           |       |
|------------------|-----------------------------------------------------------------------------------------------------------|-------|
| <b>ZDHHC2</b>    | zinc finger, DHHC-type containing 2                                                                       | 2,319 |
| <b>CPQ</b>       | carboxypeptidase Q                                                                                        | 2,316 |
| <b>HERC5</b>     | HECT and RLD domain containing E3 ubiquitin protein ligase 5                                              | 2,312 |
| <b>CTSB</b>      | cathepsin B                                                                                               | 2,310 |
| <b>MAN1C1</b>    | mannosidase, alpha, class 1C, member 1                                                                    | 2,303 |
| <b>DGAT2</b>     | diacylglycerol O-acyltransferase 2                                                                        | 2,302 |
| <b>BACE2</b>     | beta-site APP-cleaving enzyme 2                                                                           | 2,300 |
| <b>CCDC83</b>    | coiled-coil domain containing 83                                                                          | 2,293 |
| <b>PPFIA1</b>    | protein tyrosine phosphatase, receptor type, f polypeptide (PTPRF), interacting protein (liprin), alpha 1 | 2,291 |
| <b>SPOCD1</b>    | SPOC domain containing 1                                                                                  | 2,289 |
| <b>CLMN</b>      | calmin (calponin-like, transmembrane)                                                                     | 2,286 |
| <b>SYNDIG1</b>   | synapse differentiation inducing 1                                                                        | 2,281 |
| <b>CD55</b>      | CD55 molecule, decay accelerating factor for complement (Cromer blood group)                              | 2,280 |
| <b>IGFBP3</b>    | insulin-like growth factor binding protein 3                                                              | 2,280 |
| <b>PDXDC2P</b>   | pyridoxal-dependent decarboxylase domain containing 2, pseudogene                                         | 2,280 |
| <b>NETO2</b>     | neuropilin (NRP) and tolloid (TLL)-like 2                                                                 | 2,280 |
| <b>FUK</b>       | fucokinase                                                                                                | 2,277 |
| <b>WIPF1</b>     | WAS/WASL interacting protein family, member 1                                                             | 2,275 |
| <b>IFITM1</b>    | interferon induced transmembrane protein 1                                                                | 2,272 |
| <b>ANKRD23</b>   | ankyrin repeat domain 23                                                                                  | 2,269 |
| <b>CAPG</b>      | capping protein (actin filament), gelsolin-like                                                           | 2,268 |
| <b>CAST</b>      | calpastatin                                                                                               | 2,268 |
| <b>PRICKLE1</b>  | prickle homolog 1 (Drosophila)                                                                            | 2,267 |
| <b>CYP1A1</b>    | cytochrome P450, family 1, subfamily A, polypeptide 1                                                     | 2,265 |
| <b>GOLGA4</b>    | golgin A4                                                                                                 | 2,262 |
| <b>FTH1</b>      | ferritin, heavy polypeptide 1                                                                             | 2,250 |
| <b>ROBO1</b>     | roundabout, axon guidance receptor, homolog 1 (Drosophila)                                                | 2,248 |
| <b>KLF7</b>      | Kruppel-like factor 7 (ubiquitous)                                                                        | 2,247 |
| <b>TSC22D1</b>   | TSC22 domain family, member 1                                                                             | 2,245 |
| <b>PICALM</b>    | phosphatidylinositol binding clathrin assembly protein                                                    | 2,245 |
| <b>LOC286254</b> | uncharacterized LOC286254                                                                                 | 2,242 |
| <b>APP</b>       | amyloid beta (A4) precursor protein                                                                       | 2,240 |
| <b>P2RY6</b>     | pyrimidinergic receptor P2Y, G-protein coupled, 6                                                         | 2,237 |
| <b>KIAA1244</b>  | KIAA1244                                                                                                  | 2,235 |
| <b>PNRC2</b>     | proline-rich nuclear receptor coactivator 2                                                               | 2,235 |

|                 |                                                                                             |       |
|-----------------|---------------------------------------------------------------------------------------------|-------|
| <b>DSCAM</b>    | Down syndrome cell adhesion molecule                                                        | 2,233 |
| <b>SLC7A11</b>  | solute carrier family 7 (anionic amino acid transporter light chain, xc- system), member 11 | 2,233 |
| <b>HS6ST2</b>   | heparan sulfate 6-O-sulfotransferase 2                                                      | 2,230 |
| <b>TPCN1</b>    | two pore segment channel 1                                                                  | 2,230 |
| <b>GPC4</b>     | glypican 4                                                                                  | 2,216 |
| <b>SLC4A3</b>   | solute carrier family 4, anion exchanger, member 3                                          | 2,212 |
| <b>MAN1A1</b>   | mannosidase, alpha, class 1A, member 1                                                      | 2,212 |
| <b>MTRNR2L2</b> | MT-RNR2-like 2                                                                              | 2,211 |
| <b>NOL3</b>     | nucleolar protein 3 (apoptosis repressor with CARD domain)                                  | 2,207 |
| <b>MBOAT1</b>   | membrane bound O-acyltransferase domain containing 1                                        | 2,201 |
| <b>CALM1</b>    | calmodulin 1 (phosphorylase kinase, delta)                                                  | 2,193 |
| <b>AIFM3</b>    | apoptosis-inducing factor, mitochondrion-associated, 3                                      | 2,190 |
| <b>CTNND2</b>   | catenin (cadherin-associated protein), delta 2                                              | 2,190 |
| <b>NCOA3</b>    | nuclear receptor coactivator 3                                                              | 2,190 |
| <b>GPT2</b>     | glutamic pyruvate transaminase (alanine aminotransferase) 2                                 | 2,189 |
| <b>SLC22A5</b>  | solute carrier family 22 (organic cation/carnitine transporter), member 5                   | 2,188 |
| <b>TRAF5</b>    | TNF receptor-associated factor 5                                                            | 2,186 |
| <b>HOXB6</b>    | homeobox B6                                                                                 | 2,186 |
| <b>SNHG12</b>   | small nucleolar RNA host gene 12 (non-protein coding)                                       | 2,185 |
| <b>STOML1</b>   | stomatin (EPB72)-like 1                                                                     | 2,184 |
| <b>HSF4</b>     | heat shock transcription factor 4                                                           | 2,183 |
| <b>NUDT7</b>    | nudix (nucleoside diphosphate linked moiety X)-type motif 7                                 | 2,182 |
| <b>PEX19</b>    | peroxisomal biogenesis factor 19                                                            | 2,181 |
| <b>KIAA0146</b> | KIAA0146                                                                                    | 2,180 |
| <b>LCN2</b>     | lipocalin 2                                                                                 | 2,178 |
| <b>HEXB</b>     | hexosaminidase B (beta polypeptide)                                                         | 2,178 |
| <b>HERC1</b>    | HECT and RLD domain containing E3 ubiquitin protein ligase family member 1                  | 2,171 |
| <b>MTCH2</b>    | mitochondrial carrier 2                                                                     | 2,169 |
| <b>PSCA</b>     | prostate stem cell antigen                                                                  | 2,168 |
| <b>FHL2</b>     | four and a half LIM domains 2                                                               | 2,166 |
| <b>CD47</b>     | CD47 molecule                                                                               | 2,165 |
| <b>C11orf93</b> | chromosome 11 open reading frame 93                                                         | 2,163 |
| <b>POC1B</b>    | POC1 centriolar protein homolog B (Chlamydomonas)                                           | 2,161 |
| <b>AKAP1</b>    | A kinase (PRKA) anchor protein 1                                                            | 2,160 |
| <b>PRKAB2</b>   | protein kinase, AMP-activated, beta 2 non-catalytic subunit                                 | 2,160 |

|                     |                                                                           |       |
|---------------------|---------------------------------------------------------------------------|-------|
| <b>RAMP1</b>        | receptor (G protein-coupled) activity modifying protein 1                 | 2,158 |
| <b>NFE2</b>         | nuclear factor (erythroid-derived 2), 45kDa                               | 2,158 |
| <b>KLHL13</b>       | kelch-like family member 13                                               | 2,156 |
| <b>CDKL5</b>        | cyclin-dependent kinase-like 5                                            | 2,155 |
| <b>ANO6</b>         | anoctamin 6                                                               | 2,153 |
| <b>XPOT</b>         | exportin, tRNA                                                            | 2,151 |
| <b>CALML4</b>       | calmodulin-like 4                                                         | 2,151 |
| <b>OPLAH</b>        | 5-oxoprolinase (ATP-hydrolysing)                                          | 2,150 |
| <b>TOB1</b>         | transducer of ERBB2, 1                                                    | 2,150 |
| <b>STAT6</b>        | signal transducer and activator of transcription 6, interleukin-4 induced | 2,148 |
| <b>FAM107B</b>      | family with sequence similarity 107, member B                             | 2,147 |
| <b>PIM1</b>         | pim-1 oncogene                                                            | 2,146 |
| <b>NCKAP1</b>       | NCK-associated protein 1                                                  | 2,145 |
| <b>RAB7L1</b>       | RAB7, member RAS oncogene family-like 1                                   | 2,144 |
| <b>EPB41L4A-AS1</b> | EPB41L4A antisense RNA 1                                                  | 2,141 |
| <b>EIF3E</b>        | eukaryotic translation initiation factor 3, subunit E                     | 2,140 |
| <b>ITGAV</b>        | integrin, alpha V                                                         | 2,140 |
| <b>PTK2</b>         | protein tyrosine kinase 2                                                 | 2,140 |
| <b>GUSBP4</b>       | glucuronidase, beta pseudogene 4                                          | 2,134 |
| <b>BNIP3</b>        | BCL2/adenovirus E1B 19kDa interacting protein 3                           | 2,133 |
| <b>RHOBTB1</b>      | Rho-related BTB domain containing 1                                       | 2,133 |
| <b>PAQR6</b>        | progesterin and adipoQ receptor family member VI                          | 2,132 |
| <b>TRAPPC13</b>     | trafficking protein particle complex 13                                   | 2,131 |
| <b>CACNG1</b>       | calcium channel, voltage-dependent, gamma subunit 1                       | 2,129 |
| <b>HOXA10</b>       | homeobox A10                                                              | 2,129 |
| <b>SRGAP1</b>       | SLIT-ROBO Rho GTPase activating protein 1                                 | 2,127 |
| <b>MAP2K1</b>       | mitogen-activated protein kinase kinase 1                                 | 2,125 |
| <b>ITFG1</b>        | integrin alpha FG-GAP repeat containing 1                                 | 2,124 |
| <b>SCHIP1</b>       | schwannomin interacting protein 1                                         | 2,123 |
| <b>IGDCC3</b>       | immunoglobulin superfamily, DCC subclass, member 3                        | 2,121 |
| <b>ALDOC</b>        | aldolase C, fructose-bisphosphate                                         | 2,121 |
| <b>AARS</b>         | alanyl-tRNA synthetase                                                    | 2,121 |
| <b>PTBP2</b>        | polypyrimidine tract binding protein 2                                    | 2,119 |
| <b>TUFT1</b>        | tuftelin 1                                                                | 2,118 |
| <b>NIPAL2</b>       | NIPA-like domain containing 2                                             | 2,118 |

|                  |                                                                |       |
|------------------|----------------------------------------------------------------|-------|
| <b>C4orf3</b>    | chromosome 4 open reading frame 3                              | 2,117 |
| <b>SPG20</b>     | spastic paraplegia 20 (Troyer syndrome)                        | 2,117 |
| <b>LOC338799</b> | uncharacterized LOC338799                                      | 2,114 |
| <b>IFIH1</b>     | interferon induced with helicase C domain 1                    | 2,110 |
| <b>CDK5RAP3</b>  | CDK5 regulatory subunit associated protein 3                   | 2,110 |
| <b>HIPK2</b>     | homeodomain interacting protein kinase 2                       | 2,110 |
| <b>VPS13C</b>    | vacuolar protein sorting 13 homolog C ( <i>S. cerevisiae</i> ) | 2,108 |
| <b>CLPX</b>      | ClpX caseinolytic peptidase X homolog ( <i>E. coli</i> )       | 2,106 |
| <b>SPAG9</b>     | sperm associated antigen 9                                     | 2,104 |
| <b>IMPA1</b>     | inositol(myo)-1(or 4)-monophosphatase 1                        | 2,103 |
| <b>FGD3</b>      | FYVE, RhoGEF and PH domain containing 3                        | 2,103 |
| <b>ARMCX2</b>    | armadillo repeat containing, X-linked 2                        | 2,102 |
| <b>NFE2L1</b>    | nuclear factor (erythroid-derived 2)-like 1                    | 2,100 |
| <b>PPP1R9A</b>   | protein phosphatase 1, regulatory subunit 9A                   | 2,099 |
| <b>OBSL1</b>     | obscurin-like 1                                                | 2,098 |
| <b>MGST1</b>     | microsomal glutathione S-transferase 1                         | 2,097 |
| <b>COBLL1</b>    | cordon-bleu WH2 repeat protein-like 1                          | 2,094 |
| <b>TMEM68</b>    | transmembrane protein 68                                       | 2,091 |
| <b>C15orf61</b>  | chromosome 15 open reading frame 61                            | 2,090 |
| <b>B2M</b>       | beta-2-microglobulin                                           | 2,090 |
| <b>STK39</b>     | serine threonine kinase 39                                     | 2,089 |
| <b>LONP2</b>     | lon peptidase 2, peroxisomal                                   | 2,087 |
| <b>PGM2L1</b>    | phosphoglucomutase 2-like 1                                    | 2,086 |
| <b>FAM171B</b>   | family with sequence similarity 171, member B                  | 2,085 |
| <b>RASAL1</b>    | RAS protein activator like 1 (GAP1 like)                       | 2,084 |
| <b>PIGK</b>      | phosphatidylinositol glycan anchor biosynthesis, class K       | 2,083 |
| <b>SDK1</b>      | sidekick cell adhesion molecule 1                              | 2,080 |
| <b>HNRPDL</b>    | heterogeneous nuclear ribonucleoprotein D-like                 | 2,080 |
| <b>CLMP</b>      | CXADR-like membrane protein                                    | 2,080 |
| <b>LAMC2</b>     | laminin, gamma 2                                               | 2,079 |
| <b>COL16A1</b>   | collagen, type XVI, alpha 1                                    | 2,079 |
| <b>FABP5</b>     | fatty acid binding protein 5 (psoriasis-associated)            | 2,078 |
| <b>MAN2A1</b>    | mannosidase, alpha, class 2A, member 1                         | 2,076 |
| <b>PLD3</b>      | phospholipase D family, member 3                               | 2,071 |
| <b>RHBDL3</b>    | rhomboid, veinlet-like 3 ( <i>Drosophila</i> )                 | 2,071 |

|                  |                                                                             |       |
|------------------|-----------------------------------------------------------------------------|-------|
| <b>FZD5</b>      | frizzled family receptor 5                                                  | 2,070 |
| <b>TTC3</b>      | tetratricopeptide repeat domain 3                                           | 2,070 |
| <b>CPNE7</b>     | copine VII                                                                  | 2,068 |
| <b>TMEM64</b>    | transmembrane protein 64                                                    | 2,067 |
| <b>TSPAN5</b>    | tetraspanin 5                                                               | 2,066 |
| <b>PAK1</b>      | p21 protein (Cdc42/Rac)-activated kinase 1                                  | 2,064 |
| <b>AK4</b>       | adenylate kinase 4                                                          | 2,064 |
| <b>MON2</b>      | MON2 homolog ( <i>S. cerevisiae</i> )                                       | 2,062 |
| <b>AIFM2</b>     | apoptosis-inducing factor, mitochondrion-associated, 2                      | 2,059 |
| <b>PRKCA</b>     | protein kinase C, alpha                                                     | 2,059 |
| <b>PLCB1</b>     | phospholipase C, beta 1 (phosphoinositide-specific)                         | 2,058 |
| <b>VPS35</b>     | vacuolar protein sorting 35 homolog ( <i>S. cerevisiae</i> )                | 2,055 |
| <b>ANGPTL4</b>   | angiopoietin-like 4                                                         | 2,055 |
| <b>DEF6</b>      | differentially expressed in FDCP 6 homolog (mouse)                          | 2,054 |
| <b>DVL1</b>      | dishevelled, dsh homolog 1 ( <i>Drosophila</i> )                            | 2,050 |
| <b>OLFM1</b>     | olfactomedin 1                                                              | 2,050 |
| <b>EIF4A2</b>    | eukaryotic translation initiation factor 4A2                                | 2,049 |
| <b>EFCAB4B</b>   | EF-hand calcium binding domain 4B                                           | 2,049 |
| <b>TTC7B</b>     | tetratricopeptide repeat domain 7B                                          | 2,046 |
| <b>LOC389607</b> | uncharacterized LOC389607                                                   | 2,045 |
| <b>KLF12</b>     | Kruppel-like factor 12                                                      | 2,043 |
| <b>TTC39A</b>    | tetratricopeptide repeat domain 39A                                         | 2,042 |
| <b>CPNE3</b>     | copine III                                                                  | 2,042 |
| <b>NAP1L2</b>    | nucleosome assembly protein 1-like 2                                        | 2,039 |
| <b>MT-ND4</b>    | NADH dehydrogenase, subunit 4 (complex I)                                   | 2,038 |
| <b>FAM213A</b>   | family with sequence similarity 213, member A                               | 2,038 |
| <b>AK2</b>       | adenylate kinase 2                                                          | 2,038 |
| <b>RAB11FIP1</b> | RAB11 family interacting protein 1 (class I)                                | 2,035 |
| <b>SLC12A2</b>   | solute carrier family 12 (sodium/potassium/chloride transporters), member 2 | 2,034 |
| <b>PABPC1</b>    | poly(A) binding protein, cytoplasmic 1                                      | 2,034 |
| <b>LRRCC1</b>    | leucine rich repeat and coiled-coil centrosomal protein 1                   | 2,032 |
| <b>DYRK2</b>     | dual-specificity tyrosine-(Y)-phosphorylation regulated kinase 2            | 2,031 |
| <b>SLC16A14</b>  | solute carrier family 16, member 14 (monocarboxylic acid transporter 14)    | 2,031 |
| <b>RPL7</b>      | ribosomal protein L7                                                        | 2,031 |
| <b>TMCO4</b>     | transmembrane and coiled-coil domains 4                                     | 2,026 |

|                 |                                                               |       |
|-----------------|---------------------------------------------------------------|-------|
| <b>HOMER3</b>   | homer homolog 3 (Drosophila)                                  | 2,026 |
| <b>TTC37</b>    | tetratricopeptide repeat domain 37                            | 2,024 |
| <b>IGFBP6</b>   | insulin-like growth factor binding protein 6                  | 2,022 |
| <b>RPS6KA2</b>  | ribosomal protein S6 kinase, 90kDa, polypeptide 2             | 2,021 |
| <b>RABGAP1L</b> | RAB GTPase activating protein 1-like                          | 2,021 |
| <b>TESK2</b>    | testis-specific kinase 2                                      | 2,020 |
| <b>KIT</b>      | v-kit Hardy-Zuckerman 4 feline sarcoma viral oncogene homolog | 2,020 |
| <b>FZD7</b>     | frizzled family receptor 7                                    | 2,019 |
| <b>KIAA1715</b> | KIAA1715                                                      | 2,019 |
| <b>CLN3</b>     | ceroid-lipofuscinosis, neuronal 3                             | 2,019 |
| <b>WDR4</b>     | WD repeat domain 4                                            | 2,018 |
| <b>KIFAP3</b>   | kinesin-associated protein 3                                  | 2,016 |
| <b>MT-ND5</b>   | NADH dehydrogenase, subunit 5 (complex I)                     | 2,016 |
| <b>SHISA9</b>   | shisa homolog 9 (Xenopus laevis)                              | 2,014 |
| <b>C1orf21</b>  | chromosome 1 open reading frame 21                            | 2,013 |
| <b>ANK1</b>     | ankyrin 1, erythrocytic                                       | 2,012 |
| <b>RPL30</b>    | ribosomal protein L30                                         | 2,011 |
| <b>EMC2</b>     | ER membrane protein complex subunit 2                         | 2,011 |
| <b>SLC7A6OS</b> | solute carrier family 7, member 6 opposite strand             | 2,010 |
| <b>CLCN6</b>    | chloride channel, voltage-sensitive 6                         | 2,008 |
| <b>RCN1</b>     | reticulocalbin 1, EF-hand calcium binding domain              | 2,005 |
| <b>RPL23A</b>   | ribosomal protein L23a                                        | 2,002 |
| <b>XPR1</b>     | xenotropic and polytropic retrovirus receptor 1               | 2,002 |
| <b>CAPN13</b>   | calpain 13                                                    | 2,002 |
| <b>IFRD1</b>    | interferon-related developmental regulator 1                  | 2,001 |
| <b>GSE1</b>     | Gse1 coiled-coil protein                                      | 2,000 |

**Supplementary Table 2. Gene transcripts differentially down-regulated in metformin-refractory MCF-7/MET-R cells vs. metformin-naive MCF-7 parental cells.**

| <b>Symbol</b>  | <b>Entrez Gene Name</b>            | <b><math>\Delta</math></b> |
|----------------|------------------------------------|----------------------------|
| <b>CXorf61</b> | chromosome X open reading frame 61 | -23,026                    |
| <b>PMP22</b>   | peripheral myelin protein 22       | -14,517                    |
| <b>S100A14</b> | S100 calcium binding protein A14   | -14,192                    |

|                     |                                                                                        |         |
|---------------------|----------------------------------------------------------------------------------------|---------|
| <b>TFF3</b>         | trefoil factor 3 (intestinal)                                                          | -13,100 |
| <b>DKK1</b>         | dickkopf 1 homolog ( <i>Xenopus laevis</i> )                                           | -12,359 |
| <b>TFF1</b>         | trefoil factor 1                                                                       | -10,680 |
| <b>BCL2</b>         | B-cell CLL/lymphoma 2                                                                  | -10,660 |
| <b>CYP26B1</b>      | cytochrome P450, family 26, subfamily B, polypeptide 1                                 | -9,515  |
| <b>MGP</b>          | matrix Gla protein                                                                     | -9,131  |
| <b>S100A16</b>      | S100 calcium binding protein A16                                                       | -8,254  |
| <b>MSMB</b>         | microseminoprotein, beta-                                                              | -8,130  |
| <b>FKBP10</b>       | FK506 binding protein 10, 65 kDa                                                       | -7,804  |
| <b>ANXA6</b>        | annexin A6                                                                             | -7,526  |
| <b>PRR15</b>        | proline rich 15                                                                        | -7,518  |
| <b>RERG</b>         | RAS-like, estrogen-regulated, growth inhibitor                                         | -7,320  |
| <b>SPARCL1</b>      | SPARC-like 1 (hevin)                                                                   | -7,227  |
| <b>PXDN</b>         | peroxidasin homolog ( <i>Drosophila</i> )                                              | -7,150  |
| <b>EFEMP1</b>       | EGF containing fibulin-like extracellular matrix protein 1                             | -7,016  |
| <b>LOC100288911</b> | uncharacterized LOC100288911                                                           | -6,489  |
| <b>ASUN</b>         | asunder, spermatogenesis regulator                                                     | -6,109  |
| <b>FGFR1OP2</b>     | FGFR1 oncogene partner 2                                                               | -6,100  |
| <b>RASGRP1</b>      | RAS guanyl releasing protein 1 (calcium and DAG-regulated)                             | -5,720  |
| <b>MARCKS</b>       | myristoylated alanine-rich protein kinase C substrate                                  | -5,672  |
| <b>CENPA</b>        | centromere protein A                                                                   | -5,413  |
| <b>PKIB</b>         | protein kinase (cAMP-dependent, catalytic) inhibitor beta                              | -5,346  |
| <b>TP63</b>         | tumor protein p63                                                                      | -5,328  |
| <b>DPYSL5</b>       | dihydropyrimidinase-like 5                                                             | -5,256  |
| <b>SEMA3B</b>       | sema domain, immunoglobulin domain (Ig), short basic domain, secreted, (semaphorin) 3B | -5,220  |
| <b>XBP1</b>         | X-box binding protein 1                                                                | -5,120  |
| <b>FAM84A</b>       | family with sequence similarity 84, member A                                           | -4,810  |
| <b>LOC100507584</b> | uncharacterized LOC100507584                                                           | -4,799  |
| <b>PIF1</b>         | PIF1 5'-to-3' DNA helicase homolog ( <i>S. cerevisiae</i> )                            | -4,658  |
| <b>HPN</b>          | hepsin                                                                                 | -4,647  |
| <b>PODXL</b>        | podocalyxin-like                                                                       | -4,567  |
| <b>TXNIP</b>        | thioredoxin interacting protein                                                        | -4,403  |
| <b>SYT17</b>        | synaptotagmin XVII                                                                     | -4,384  |
| <b>KRT13</b>        | keratin 13                                                                             | -4,361  |
| <b>N4BP3</b>        | NEDD4 binding protein 3                                                                | -4,260  |



|                  |                                                                          |        |
|------------------|--------------------------------------------------------------------------|--------|
| <b>KIF20A</b>    | kinesin family member 20A                                                | -4,200 |
| <b>ID1</b>       | inhibitor of DNA binding 1, dominant negative helix-loop-helix protein   | -4,139 |
| <b>FAM25A</b>    | family with sequence similarity 25, member A                             | -4,136 |
| <b>HMMR</b>      | hyaluronan-mediated motility receptor (RHAMM)                            | -4,063 |
| <b>C1QTNF6</b>   | C1q and tumor necrosis factor related protein 6                          | -4,061 |
| <b>OSBPL6</b>    | oxysterol binding protein-like 6                                         | -4,052 |
| <b>UGT2B15</b>   | UDP glucuronosyltransferase 2 family, polypeptide B15                    | -3,989 |
| <b>SYTL5</b>     | synaptotagmin-like 5                                                     | -3,985 |
| <b>LOC728392</b> | uncharacterized LOC728392                                                | -3,959 |
| <b>GALM</b>      | galactose mutarotase (aldose 1-epimerase)                                | -3,880 |
| <b>PREX1</b>     | phosphatidylinositol-3,4,5-trisphosphate-dependent Rac exchange factor 1 | -3,834 |
| <b>DLC1</b>      | deleted in liver cancer 1                                                | -3,770 |
| <b>C12orf60</b>  | chromosome 12 open reading frame 60                                      | -3,751 |
| <b>DNAJC22</b>   | DnaJ (Hsp40) homolog, subfamily C, member 22                             | -3,680 |
| <b>RLN2</b>      | relaxin 2                                                                | -3,667 |
| <b>DBNDD2</b>    | dysbindin (dystrobrevin binding protein 1) domain containing 2           | -3,636 |
| <b>CAV1</b>      | caveolin 1, caveolae protein, 22kDa                                      | -3,630 |
| <b>PLK1</b>      | polo-like kinase 1                                                       | -3,620 |
| <b>BIRC5</b>     | baculoviral IAP repeat containing 5                                      | -3,600 |
| <b>TMEM150C</b>  | transmembrane protein 150C                                               | -3,591 |
| <b>FAM83D</b>    | family with sequence similarity 83, member D                             | -3,554 |
| <b>SPDEF</b>     | SAM pointed domain containing ets transcription factor                   | -3,552 |
| <b>EGR1</b>      | early growth response 1                                                  | -3,542 |
| <b>UBALD2</b>    | UBA-like domain containing 2                                             | -3,453 |
| <b>SIDT1</b>     | SID1 transmembrane family, member 1                                      | -3,451 |
| <b>S100A10</b>   | S100 calcium binding protein A10                                         | -3,432 |
| <b>AUTS2</b>     | autism susceptibility candidate 2                                        | -3,417 |
| <b>PTTG2</b>     | pituitary tumor-transforming 2                                           | -3,397 |
| <b>SGCE</b>      | sarcoglycan, epsilon                                                     | -3,380 |
| <b>CDH18</b>     | cadherin 18, type 2                                                      | -3,305 |
| <b>LRG1</b>      | leucine-rich alpha-2-glycoprotein 1                                      | -3,304 |
| <b>ADIPOR2</b>   | adiponectin receptor 2                                                   | -3,300 |
| <b>FAM133A</b>   | family with sequence similarity 133, member A                            | -3,300 |
| <b>SCUBE2</b>    | signal peptide, CUB domain, EGF-like 2                                   | -3,244 |
| <b>UGT2B17</b>   | UDP glucuronosyltransferase 2 family, polypeptide B17                    | -3,240 |

|                |                                                                                              |        |
|----------------|----------------------------------------------------------------------------------------------|--------|
| <b>LMCD1</b>   | LIM and cysteine-rich domains 1                                                              | -3,215 |
| <b>SEMA3C</b>  | sema domain, immunoglobulin domain (Ig), short basic domain, secreted, (semaphorin) 3C       | -3,208 |
| <b>OGDHL</b>   | oxoglutarate dehydrogenase-like                                                              | -3,195 |
| <b>UBE2C</b>   | ubiquitin-conjugating enzyme E2C                                                             | -3,180 |
| <b>SH3BGRL</b> | SH3 domain binding glutamic acid-rich protein like                                           | -3,163 |
| <b>GPR143</b>  | G protein-coupled receptor 143                                                               | -3,153 |
| <b>LMBR1</b>   | limb region 1 homolog (mouse)                                                                | -3,150 |
| <b>SLC4A10</b> | solute carrier family 4, sodium bicarbonate transporter, member 10                           | -3,150 |
| <b>PLEKHA4</b> | pleckstrin homology domain containing, family A (phosphoinositide binding specific) member 4 | -3,146 |
| <b>COL4A6</b>  | collagen, type IV, alpha 6                                                                   | -3,146 |
| <b>NOXO1</b>   | NADPH oxidase organizer 1                                                                    | -3,132 |
| <b>KREMEN2</b> | kringle containing transmembrane protein 2                                                   | -3,118 |
| <b>DLGAP5</b>  | discs, large (Drosophila) homolog-associated protein 5                                       | -3,111 |
| <b>KAZALD1</b> | Kazal-type serine peptidase inhibitor domain 1                                               | -3,092 |
| <b>EIF4E2</b>  | eukaryotic translation initiation factor 4E family member 2                                  | -3,079 |
| <b>ASCL1</b>   | achaete-scute complex homolog 1 (Drosophila)                                                 | -3,071 |
| <b>GTSE1</b>   | G-2 and S-phase expressed 1                                                                  | -3,040 |
| <b>REEP2</b>   | receptor accessory protein 2                                                                 | -3,034 |
| <b>FZD2</b>    | frizzled family receptor 2                                                                   | -3,034 |
| <b>AURKA</b>   | aurora kinase A                                                                              | -3,026 |
| <b>SEMA6A</b>  | sema domain, transmembrane domain (TM), and cytoplasmic domain, (semaphorin) 6A              | -3,022 |
| <b>CCNB1</b>   | cyclin B1                                                                                    | -3,020 |
| <b>AFAP1L2</b> | actin filament associated protein 1-like 2                                                   | -3,013 |
| <b>ANXA8L2</b> | annexin A8-like 2                                                                            | -3,002 |
| <b>CENPF</b>   | centromere protein F, 350/400kDa                                                             | -2,998 |
| <b>SGCG</b>    | sarcoglycan, gamma (35kDa dystrophin-associated glycoprotein)                                | -2,994 |
| <b>KNSTRN</b>  | kinetochore-localized astrin/SPAG5 binding protein                                           | -2,960 |
| <b>FZD4</b>    | frizzled family receptor 4                                                                   | -2,955 |
| <b>PTTG1</b>   | pituitary tumor-transforming 1                                                               | -2,945 |
| <b>LFNG</b>    | LFNG O-fucosylpeptide 3-beta-N-acetylglucosaminyltransferase                                 | -2,939 |
| <b>DHRS2</b>   | dehydrogenase/reductase (SDR family) member 2                                                | -2,920 |
| <b>SCD5</b>    | stearoyl-CoA desaturase 5                                                                    | -2,910 |
| <b>CCNA2</b>   | cyclin A2                                                                                    | -2,890 |
| <b>CDC25C</b>  | cell division cycle 25C                                                                      | -2,889 |
| <b>GJB7</b>    | gap junction protein, beta 7, 25kDa                                                          | -2,862 |

|                   |                                                                                                               |        |
|-------------------|---------------------------------------------------------------------------------------------------------------|--------|
| <b>C14orf132</b>  | chromosome 14 open reading frame 132                                                                          | -2,860 |
| <b>CDKN3</b>      | cyclin-dependent kinase inhibitor 3                                                                           | -2,847 |
| <b>TP53I3</b>     | tumor protein p53 inducible protein 3                                                                         | -2,819 |
| <b>CA8</b>        | carbonic anhydrase VIII                                                                                       | -2,811 |
| <b>H2AFJ</b>      | H2A histone family, member J                                                                                  | -2,810 |
| <b>BFSP2</b>      | beaded filament structural protein 2, phakinin                                                                | -2,804 |
| <b>SOCS3</b>      | suppressor of cytokine signaling 3                                                                            | -2,800 |
| <b>GPRC5A</b>     | G protein-coupled receptor, family C, group 5, member A                                                       | -2,800 |
| <b>NDC80</b>      | NDC80 kinetochore complex component                                                                           | -2,784 |
| <b>HIST1H2AM</b>  | histone cluster 1, H2ag                                                                                       | -2,769 |
| <b>ASPM</b>       | asp (abnormal spindle) homolog, microcephaly associated (Drosophila)                                          | -2,764 |
| <b>C19orf21</b>   | chromosome 19 open reading frame 21                                                                           | -2,751 |
| <b>UGT2B10</b>    | UDP glucuronosyltransferase 2 family, polypeptide B10                                                         | -2,750 |
| <b>AMOTL1</b>     | angiomin like 1                                                                                               | -2,750 |
| <b>RAB36</b>      | RAB36, member RAS oncogene family                                                                             | -2,737 |
| <b>AREG/AREGB</b> | amphiregulin                                                                                                  | -2,733 |
| <b>DOK7</b>       | docking protein 7                                                                                             | -2,731 |
| <b>ITPRIPL2</b>   | inositol 1,4,5-trisphosphate receptor interacting protein-like 2                                              | -2,730 |
| <b>CDV3</b>       | CDV3 homolog (mouse)                                                                                          | -2,690 |
| <b>TUBB3</b>      | tubulin, beta 3 class III                                                                                     | -2,690 |
| <b>RRM2</b>       | ribonucleotide reductase M2                                                                                   | -2,688 |
| <b>SDS</b>        | serine dehydratase                                                                                            | -2,688 |
| <b>BHLHE41</b>    | basic helix-loop-helix family, member e41                                                                     | -2,683 |
| <b>LGALS3BP</b>   | lectin, galactoside-binding, soluble, 3 binding protein                                                       | -2,678 |
| <b>EDN1</b>       | endothelin 1                                                                                                  | -2,670 |
| <b>FLJ20021</b>   | uncharacterized LOC90024                                                                                      | -2,653 |
| <b>C10orf107</b>  | chromosome 10 open reading frame 107                                                                          | -2,653 |
| <b>TUBB4A</b>     | tubulin, beta 4A class IVa                                                                                    | -2,652 |
| <b>CDCA3</b>      | cell division cycle associated 3                                                                              | -2,650 |
| <b>HIST1H2AH</b>  | histone cluster 1, H2ah                                                                                       | -2,644 |
| <b>C2CD4C</b>     | C2 calcium-dependent domain containing 4C                                                                     | -2,643 |
| <b>ST6GALNAC2</b> | ST6 (alpha-N-acetyl-neuraminyl-2,3-beta-galactosyl-1,3)-N-acetylgalactosaminide alpha-2,6-sialyltransferase 2 | -2,637 |
| <b>FAM155A</b>    | family with sequence similarity 155, member A                                                                 | -2,629 |
| <b>PSRC1</b>      | proline/serine-rich coiled-coil 1                                                                             | -2,623 |
| <b>KPNA2</b>      | karyopherin alpha 2 (RAG cohort 1, importin alpha 1)                                                          | -2,623 |

|                      |                                                                                                  |        |
|----------------------|--------------------------------------------------------------------------------------------------|--------|
| <b>GALNT12</b>       | UDP-N-acetyl-alpha-D-galactosamine:polypeptide N-acetylgalactosaminyltransferase 12 (GalNAc-T12) | -2,619 |
| <b>IL4R</b>          | interleukin 4 receptor                                                                           | -2,608 |
| <b>TEX19</b>         | testis expressed 19                                                                              | -2,606 |
| <b>TROAP</b>         | trophinin associated protein                                                                     | -2,602 |
| <b>PMEPA1</b>        | prostate transmembrane protein, androgen induced 1                                               | -2,601 |
| <b>RAB31</b>         | RAB31, member RAS oncogene family                                                                | -2,600 |
| <b>SPANXC</b>        | SPANX family, member C                                                                           | -2,596 |
| <b>CD36</b>          | CD36 molecule (thrombospondin receptor)                                                          | -2,592 |
| <b>FHL1</b>          | four and a half LIM domains 1                                                                    | -2,588 |
| <b>CRIP2</b>         | cysteine-rich protein 2                                                                          | -2,587 |
| <b>CCDC117</b>       | coiled-coil domain containing 117                                                                | -2,583 |
| <b>KCNK5</b>         | potassium channel, subfamily K, member 5                                                         | -2,577 |
| <b>ATP8A2</b>        | ATPase, aminophospholipid transporter, class I, type 8A, member 2                                | -2,568 |
| <b>PDZK1</b>         | PDZ domain containing 1                                                                          | -2,563 |
| <b>ABCG1</b>         | ATP-binding cassette, sub-family G (WHITE), member 1                                             | -2,554 |
| <b>ITGA2</b>         | integrin, alpha 2 (CD49B, alpha 2 subunit of VLA-2 receptor)                                     | -2,548 |
| <b>SKA3</b>          | spindle and kinetochore associated complex subunit 3                                             | -2,540 |
| <b>NXNL2</b>         | nucleoredoxin-like 2                                                                             | -2,531 |
| <b>ZSCAN18</b>       | zinc finger and SCAN domain containing 18                                                        | -2,525 |
| <b>TUBB6</b>         | tubulin, beta 6 class V                                                                          | -2,522 |
| <b>SSPN</b>          | sarcospan                                                                                        | -2,519 |
| <b>ARNT2</b>         | aryl-hydrocarbon receptor nuclear translocator 2                                                 | -2,517 |
| <b>FOS</b>           | FBJ murine osteosarcoma viral oncogene homolog                                                   | -2,517 |
| <b>GALNT16</b>       | UDP-N-acetyl-alpha-D-galactosamine:polypeptide N-acetylgalactosaminyltransferase 16              | -2,514 |
| <b>ZFP36L2</b>       | ZFP36 ring finger protein-like 2                                                                 | -2,501 |
| <b>CENPE</b>         | centromere protein E, 312kDa                                                                     | -2,500 |
| <b>PLCB4</b>         | phospholipase C, beta 4                                                                          | -2,487 |
| <b>LEPREL4</b>       | leprecan-like 4                                                                                  | -2,487 |
| <b>NMU</b>           | neuromedin U                                                                                     | -2,485 |
| <b>SMOC2</b>         | SPARC related modular calcium binding 2                                                          | -2,481 |
| <b>DCDC2</b>         | doublecortin domain containing 2                                                                 | -2,478 |
| <b>FSD1</b>          | fibronectin type III and SPRY domain containing 1                                                | -2,477 |
| <b>GALNT14</b>       | UDP-N-acetyl-alpha-D-galactosamine:polypeptide N-acetylgalactosaminyltransferase 14 (GalNAc-T14) | -2,470 |
| <b>ZNF417/ZNF587</b> | zinc finger protein 587                                                                          | -2,470 |
| <b>ODC1</b>          | ornithine decarboxylase 1                                                                        | -2,467 |

|                     |                                                                                                     |        |
|---------------------|-----------------------------------------------------------------------------------------------------|--------|
| <b>BUB1</b>         | BUB1 mitotic checkpoint serine/threonine kinase                                                     | -2,462 |
| <b>NTMT1</b>        | N-terminal Xaa-Pro-Lys N-methyltransferase 1                                                        | -2,460 |
| <b>POLR2L</b>       | polymerase (RNA) II (DNA directed) polypeptide L, 7.6kDa                                            | -2,459 |
| <b>NT5DC2</b>       | 5'-nucleotidase domain containing 2                                                                 | -2,459 |
| <b>NPY1R</b>        | neuropeptide Y receptor Y1                                                                          | -2,456 |
| <b>ADIRF</b>        | adipogenesis regulatory factor                                                                      | -2,451 |
| <b>PTPRC</b>        | protein tyrosine phosphatase, receptor type, C                                                      | -2,450 |
| <b>PRKAR2B</b>      | protein kinase, cAMP-dependent, regulatory, type II, beta                                           | -2,447 |
| <b>KIAA1211</b>     | KIAA1211                                                                                            | -2,446 |
| <b>FAM64A</b>       | family with sequence similarity 64, member A                                                        | -2,440 |
| <b>HSCB</b>         | HscB iron-sulfur cluster co-chaperone homolog (E. coli)                                             | -2,440 |
| <b>NRBP1</b>        | nuclear receptor binding protein 1                                                                  | -2,439 |
| <b>MGAT4A</b>       | mannosyl (alpha-1,3-)-glycoprotein beta-1,4-N-acetylglucosaminyltransferase, isozyme A              | -2,437 |
| <b>BMP7</b>         | bone morphogenetic protein 7                                                                        | -2,430 |
| <b>CDC20</b>        | cell division cycle 20                                                                              | -2,430 |
| <b>EYA2</b>         | eyes absent homolog 2 (Drosophila)                                                                  | -2,429 |
| <b>TSR2</b>         | TSR2, 20S rRNA accumulation, homolog (S. cerevisiae)                                                | -2,420 |
| <b>KRT80</b>        | keratin 80                                                                                          | -2,417 |
| <b>SERPINH1</b>     | serpin peptidase inhibitor, clade H (heat shock protein 47), member 1, (collagen binding protein 1) | -2,411 |
| <b>ABAT</b>         | 4-aminobutyrate aminotransferase                                                                    | -2,410 |
| <b>TNFAIP8L1</b>    | tumor necrosis factor, alpha-induced protein 8-like 1                                               | -2,409 |
| <b>FOXM1</b>        | forkhead box M1                                                                                     | -2,409 |
| <b>NT5C2</b>        | 5'-nucleotidase, cytosolic II                                                                       | -2,405 |
| <b>EFCAB11</b>      | EF-hand calcium binding domain 11                                                                   | -2,399 |
| <b>FKBP1B</b>       | FK506 binding protein 1B, 12.6 kDa                                                                  | -2,399 |
| <b>HSD17B11</b>     | hydroxysteroid (17-beta) dehydrogenase 11                                                           | -2,396 |
| <b>TBC1D16</b>      | TBC1 domain family, member 16                                                                       | -2,392 |
| <b>TGFB1</b>        | transforming growth factor, beta 1                                                                  | -2,380 |
| <b>POC1A</b>        | POC1 centriolar protein homolog A (Chlamydomonas)                                                   | -2,377 |
| <b>SMTN</b>         | smoothelin                                                                                          | -2,376 |
| <b>KCNMB4</b>       | potassium large conductance calcium-activated channel, subfamily M, beta member 4                   | -2,374 |
| <b>BIK</b>          | BCL2-interacting killer (apoptosis-inducing)                                                        | -2,371 |
| <b>ADAMTS9</b>      | ADAM metallopeptidase with thrombospondin type 1 motif, 9                                           | -2,370 |
| <b>LOC100996341</b> | putative uncharacterized protein FLJ11871-like                                                      | -2,365 |
| <b>KIF5C</b>        | kinesin family member 5C                                                                            | -2,356 |

|                 |                                                        |        |
|-----------------|--------------------------------------------------------|--------|
| <b>FBXO15</b>   | F-box protein 15                                       | -2,353 |
| <b>VAV1</b>     | vav 1 guanine nucleotide exchange factor               | -2,352 |
| <b>FILIP1L</b>  | filamin A interacting protein 1-like                   | -2,345 |
| <b>C7orf41</b>  | chromosome 7 open reading frame 41                     | -2,341 |
| <b>TPX2</b>     | TPX2, microtubule-associated, homolog (Xenopus laevis) | -2,337 |
| <b>C6orf52</b>  | chromosome 6 open reading frame 52                     | -2,337 |
| <b>KIF4A</b>    | kinesin family member 4A                               | -2,337 |
| <b>LOC93622</b> | Morf4 family associated protein 1-like 1 pseudogene    | -2,336 |
| <b>GINS4</b>    | GINS complex subunit 4 (Sld5 homolog)                  | -2,333 |
| <b>MAP9</b>     | microtubule-associated protein 9                       | -2,330 |
| <b>ZMYND8</b>   | zinc finger, MYND-type containing 8                    | -2,330 |
| <b>PVT1</b>     | Pvt1 oncogene (non-protein coding)                     | -2,327 |
| <b>N4BP2L2</b>  | NEDD4 binding protein 2-like 2                         | -2,322 |
| <b>TACC1</b>    | transforming, acidic coiled-coil containing protein 1  | -2,320 |
| <b>YPEL1</b>    | yippee-like 1 (Drosophila)                             | -2,318 |
| <b>EHD2</b>     | EH-domain containing 2                                 | -2,313 |
| <b>UBL3</b>     | ubiquitin-like 3                                       | -2,310 |
| <b>COQ2</b>     | coenzyme Q2 homolog, prenyltransferase (yeast)         | -2,305 |
| <b>TSPAN4</b>   | tetraspanin 4                                          | -2,300 |
| <b>VASH1</b>    | vasohibin 1                                            | -2,299 |
| <b>HIST1H4A</b> | histone cluster 1, H4a                                 | -2,295 |
| <b>AURKB</b>    | aurora kinase B                                        | -2,285 |
| <b>COL5A1</b>   | collagen, type V, alpha 1                              | -2,283 |
| <b>S100A13</b>  | S100 calcium binding protein A13                       | -2,282 |
| <b>TPRN</b>     | taperin                                                | -2,282 |
| <b>PGLYRP2</b>  | peptidoglycan recognition protein 2                    | -2,280 |
| <b>PRRT3</b>    | proline-rich transmembrane protein 3                   | -2,275 |
| <b>SCD</b>      | stearoyl-CoA desaturase (delta-9-desaturase)           | -2,270 |
| <b>APOLD1</b>   | apolipoprotein L domain containing 1                   | -2,269 |
| <b>DOK4</b>     | docking protein 4                                      | -2,266 |
| <b>STRA13</b>   | stimulated by retinoic acid 13                         | -2,266 |
| <b>DNAJB5</b>   | DnaJ (Hsp40) homolog, subfamily B, member 5            | -2,265 |
| <b>LYPD1</b>    | LY6/PLAUR domain containing 1                          | -2,264 |
| <b>RIMS4</b>    | regulating synaptic membrane exocytosis 4              | -2,258 |
| <b>GSTZ1</b>    | glutathione S-transferase zeta 1                       | -2,251 |

|                  |                                                                                                  |        |
|------------------|--------------------------------------------------------------------------------------------------|--------|
| <b>LOC389831</b> | uncharacterized LOC389831                                                                        | -2,250 |
| <b>ACTG2</b>     | actin, gamma 2, smooth muscle, enteric                                                           | -2,250 |
| <b>LRFN4</b>     | leucine rich repeat and fibronectin type III domain containing 4                                 | -2,249 |
| <b>LRRC73</b>    | leucine rich repeat containing 73                                                                | -2,248 |
| <b>GALNT10</b>   | UDP-N-acetyl-alpha-D-galactosamine:polypeptide N-acetylgalactosaminyltransferase 10 (GalNAc-T10) | -2,219 |
| <b>PCYT2</b>     | phosphate cytidyltransferase 2, ethanolamine                                                     | -2,217 |
| <b>KRT24</b>     | keratin 24                                                                                       | -2,215 |
| <b>ABLIM1</b>    | actin binding LIM protein 1                                                                      | -2,213 |
| <b>ALYREF</b>    | Aly/REF export factor                                                                            | -2,210 |
| <b>CACNG6</b>    | calcium channel, voltage-dependent, gamma subunit 6                                              | -2,204 |
| <b>COL4A5</b>    | collagen, type IV, alpha 5                                                                       | -2,202 |
| <b>SYNGR2</b>    | synaptogyrin 2                                                                                   | -2,200 |
| <b>FAM72D</b>    | family with sequence similarity 72, member D                                                     | -2,193 |
| <b>FBP2</b>      | fructose-1,6-bisphosphatase 2                                                                    | -2,192 |
| <b>SMPDL3A</b>   | sphingomyelin phosphodiesterase, acid-like 3A                                                    | -2,190 |
| <b>ARHGAP11A</b> | Rho GTPase activating protein 11A                                                                | -2,190 |
| <b>SKA2</b>      | spindle and kinetochore associated complex subunit 2                                             | -2,190 |
| <b>DTYMK</b>     | deoxythymidylate kinase (thymidylate kinase)                                                     | -2,186 |
| <b>GAS2L3</b>    | growth arrest-specific 2 like 3                                                                  | -2,186 |
| <b>MAP6D1</b>    | MAP6 domain containing 1                                                                         | -2,185 |
| <b>LINC00473</b> | long intergenic non-protein coding RNA 473                                                       | -2,180 |
| <b>APBB2</b>     | amyloid beta (A4) precursor protein-binding, family B, member 2                                  | -2,179 |
| <b>UCK1</b>      | uridine-cytidine kinase 1                                                                        | -2,178 |
| <b>NAV2</b>      | neuron navigator 2                                                                               | -2,173 |
| <b>ID4</b>       | inhibitor of DNA binding 4, dominant negative helix-loop-helix protein                           | -2,172 |
| <b>TACC3</b>     | transforming, acidic coiled-coil containing protein 3                                            | -2,170 |
| <b>CYR61</b>     | cysteine-rich, angiogenic inducer, 61                                                            | -2,170 |
| <b>RGS3</b>      | regulator of G-protein signaling 3                                                               | -2,167 |
| <b>NEK2</b>      | NIMA-related kinase 2                                                                            | -2,167 |
| <b>CSTF3</b>     | cleavage stimulation factor, 3' pre-RNA, subunit 3, 77kDa                                        | -2,163 |
| <b>MUC3A</b>     | mucin 3A, cell surface associated                                                                | -2,162 |
| <b>B9D2</b>      | B9 protein domain 2                                                                              | -2,160 |
| <b>C19orf33</b>  | chromosome 19 open reading frame 33                                                              | -2,160 |
| <b>ARL16</b>     | ADP-ribosylation factor-like 16                                                                  | -2,160 |
| <b>FJX1</b>      | four jointed box 1 (Drosophila)                                                                  | -2,155 |

|                 |                                                                     |        |
|-----------------|---------------------------------------------------------------------|--------|
| <b>CCDC71L</b>  | coiled-coil domain containing 71-like                               | -2,152 |
| <b>MSL3</b>     | male-specific lethal 3 homolog (Drosophila)                         | -2,149 |
| <b>PHF19</b>    | PHD finger protein 19                                               | -2,147 |
| <b>NCAPG</b>    | non-SMC condensin I complex, subunit G                              | -2,142 |
| <b>CCNB2</b>    | cyclin B2                                                           | -2,141 |
| <b>CADM1</b>    | cell adhesion molecule 1                                            | -2,140 |
| <b>NAB1</b>     | NGFI-A binding protein 1 (EGR1 binding protein 1)                   | -2,140 |
| <b>KIF18A</b>   | kinesin family member 18A                                           | -2,139 |
| <b>CCDC134</b>  | coiled-coil domain containing 134                                   | -2,138 |
| <b>SAMD11</b>   | sterile alpha motif domain containing 11                            | -2,133 |
| <b>CALML5</b>   | calmodulin-like 5                                                   | -2,132 |
| <b>ARHGEF39</b> | Rho guanine nucleotide exchange factor (GEF) 39                     | -2,131 |
| <b>SLC22A15</b> | solute carrier family 22, member 15                                 | -2,130 |
| <b>HJURP</b>    | Holliday junction recognition protein                               | -2,130 |
| <b>RGS22</b>    | regulator of G-protein signaling 22                                 | -2,129 |
| <b>SLC27A4</b>  | solute carrier family 27 (fatty acid transporter), member 4         | -2,123 |
| <b>NXP3</b>     | neurexophilin 3                                                     | -2,120 |
| <b>MXD3</b>     | MAX dimerization protein 3                                          | -2,115 |
| <b>CYB561D2</b> | cytochrome b561 family, member D2                                   | -2,112 |
| <b>HN1</b>      | hematological and neurological expressed 1                          | -2,110 |
| <b>GEMIN6</b>   | gem (nuclear organelle) associated protein 6                        | -2,109 |
| <b>GPS1</b>     | G protein pathway suppressor 1                                      | -2,103 |
| <b>MEGF9</b>    | multiple EGF-like-domains 9                                         | -2,102 |
| <b>ARL6IP1</b>  | ADP-ribosylation factor-like 6 interacting protein 1                | -2,101 |
| <b>ORAI2</b>    | ORAI calcium release-activated calcium modulator 2                  | -2,097 |
| <b>UGT2B11</b>  | UDP glucuronosyltransferase 2 family, polypeptide B11               | -2,096 |
| <b>CENPM</b>    | centromere protein M                                                | -2,091 |
| <b>KLHDC3</b>   | kelch domain containing 3                                           | -2,090 |
| <b>KRTAP4-1</b> | keratin associated protein 4-1                                      | -2,090 |
| <b>ITGB5</b>    | integrin, beta 5                                                    | -2,089 |
| <b>SPC25</b>    | SPC25, NDC80 kinetochore complex component, homolog (S. cerevisiae) | -2,087 |
| <b>BAG1</b>     | BCL2-associated athanogene                                          | -2,083 |
| <b>HID1</b>     | HID1 domain containing                                              | -2,082 |
| <b>PTTG3P</b>   | pituitary tumor-transforming 3, pseudogene                          | -2,081 |
| <b>OGFOD3</b>   | 2-oxoglutarate and iron-dependent oxygenase domain containing 3     | -2,079 |



|                  |                                                                                                   |        |
|------------------|---------------------------------------------------------------------------------------------------|--------|
| <b>LYPD6</b>     | LY6/PLAUR domain containing 6                                                                     | -2,078 |
| <b>CKS2</b>      | CDC28 protein kinase regulatory subunit 2                                                         | -2,077 |
| <b>TIMP2</b>     | TIMP metalloproteinase inhibitor 2                                                                | -2,076 |
| <b>KIN</b>       | KIN, antigenic determinant of recA protein homolog (mouse)                                        | -2,073 |
| <b>CHMP4B</b>    | charged multivesicular body protein 4B                                                            | -2,072 |
| <b>LRIG1</b>     | leucine-rich repeats and immunoglobulin-like domains 1                                            | -2,072 |
| <b>MFSD12</b>    | major facilitator superfamily domain containing 12                                                | -2,070 |
| <b>TNFRSF11B</b> | tumor necrosis factor receptor superfamily, member 11b                                            | -2,070 |
| <b>MED18</b>     | mediator complex subunit 18                                                                       | -2,067 |
| <b>SMARCD3</b>   | SWI/SNF related, matrix associated, actin dependent regulator of chromatin, subfamily d, member 3 | -2,066 |
| <b>SUSD2</b>     | sushi domain containing 2                                                                         | -2,064 |
| <b>ARHGAP36</b>  | Rho GTPase activating protein 36                                                                  | -2,064 |
| <b>MMD</b>       | monocyte to macrophage differentiation-associated                                                 | -2,061 |
| <b>CXCR4</b>     | chemokine (C-X-C motif) receptor 4                                                                | -2,060 |
| <b>DENND1A</b>   | DENN/MADD domain containing 1A                                                                    | -2,058 |
| <b>SEPT9</b>     | septin 9                                                                                          | -2,056 |
| <b>ITGB1BP1</b>  | integrin beta 1 binding protein 1                                                                 | -2,050 |
| <b>CFD</b>       | complement factor D (adipsin)                                                                     | -2,050 |
| <b>C9orf3</b>    | chromosome 9 open reading frame 3                                                                 | -2,050 |
| <b>TUBB4B</b>    | tubulin, beta 4B class IVb                                                                        | -2,049 |
| <b>PEG10</b>     | paternally expressed 10                                                                           | -2,049 |
| <b>H2AFX</b>     | H2A histone family, member X                                                                      | -2,049 |
| <b>SNX17</b>     | sorting nexin 17                                                                                  | -2,049 |
| <b>RIN1</b>      | Ras and Rab interactor 1                                                                          | -2,043 |
| <b>KCNF1</b>     | potassium voltage-gated channel, subfamily F, member 1                                            | -2,042 |
| <b>KIF11</b>     | kinesin family member 11                                                                          | -2,041 |
| <b>RTN2</b>      | reticulon 2                                                                                       | -2,041 |
| <b>CXXC4</b>     | CXXC finger protein 4                                                                             | -2,040 |
| <b>RHOH</b>      | ras homolog family member H                                                                       | -2,040 |
| <b>NFYB</b>      | nuclear transcription factor Y, beta                                                              | -2,038 |
| <b>ADI1</b>      | acireductone dioxygenase 1                                                                        | -2,036 |
| <b>CHMP6</b>     | charged multivesicular body protein 6                                                             | -2,034 |
| <b>PRADC1</b>    | protease-associated domain containing 1                                                           | -2,034 |
| <b>RTKN2</b>     | rhotekin 2                                                                                        | -2,022 |
| <b>C7orf29</b>   | chromosome 7 open reading frame 29                                                                | -2,022 |

|                 |                                                                                               |        |
|-----------------|-----------------------------------------------------------------------------------------------|--------|
| <b>MKI67</b>    | antigen identified by monoclonal antibody Ki-67                                               | -2,020 |
| <b>HTRA1</b>    | HtrA serine peptidase 1                                                                       | -2,020 |
| <b>CLDN4</b>    | claudin 4                                                                                     | -2,016 |
| <b>UROS</b>     | uroporphyrinogen III synthase                                                                 | -2,016 |
| <b>ARFIP2</b>   | ADP-ribosylation factor interacting protein 2                                                 | -2,016 |
| <b>ARMC7</b>    | armadillo repeat containing 7                                                                 | -2,012 |
| <b>SLC31A2</b>  | solute carrier family 31 (copper transporters), member 2                                      | -2,012 |
| <b>GPER</b>     | G protein-coupled estrogen receptor 1                                                         | -2,010 |
| <b>NAB2</b>     | NGFI-A binding protein 2 (EGR1 binding protein 2)                                             | -2,010 |
| <b>UBA5</b>     | ubiquitin-like modifier activating enzyme 5                                                   | -2,007 |
| <b>SLC9A3R2</b> | solute carrier family 9, subfamily A (NHE3, cation proton antiporter 3), member 3 regulator 2 | -2,004 |
| <b>NT5C</b>     | 5', 3'-nucleotidase, cytosolic                                                                | -2,003 |
| <b>FAM83B</b>   | family with sequence similarity 83, member B                                                  | -2,001 |
